# Supplementary material for: Two-dimensional porous CeO2@Co3O4 sheet-like heterostructures for high-performance aqueous hybrid supercapacitors
Source: Royal Society of Chemistry journal article supplement (doi:10.1039/d2dt02881f), 2022-01-01
Supplement: d2dt02881f1.pdf [file d2dt02881f1.pdf]

Supporting information

**Two-dimensional porous CeO<sub>2</sub>@Co<sub>3</sub>O<sub>4</sub> sheet-like heterostructures for  
high-performance aqueous hybrid supercapacitors**

Guiyuan Yang <sup>a</sup>, Qihui Cheng <sup>a</sup>, Fangfang Liao <sup>a</sup>, Lei Mao <sup>a</sup>, Xun Zhao <sup>a</sup>, and Lingyun Chen <sup>a,b \*</sup>

<sup>a</sup> School of Chemistry and Chemical Engineering, Chongqing University, Chongqing 401331, P. R.

China

<sup>b</sup> National-Municipal Joint Engineering Laboratory for Chemical Process Intensification and

Reaction, Chongqing University, Chongqing 401331, P. R. China

\*Corresponding author. E-mail address: [lychen@cqu.edu.cn](mailto:lychen@cqu.edu.cn) (L. Chen)

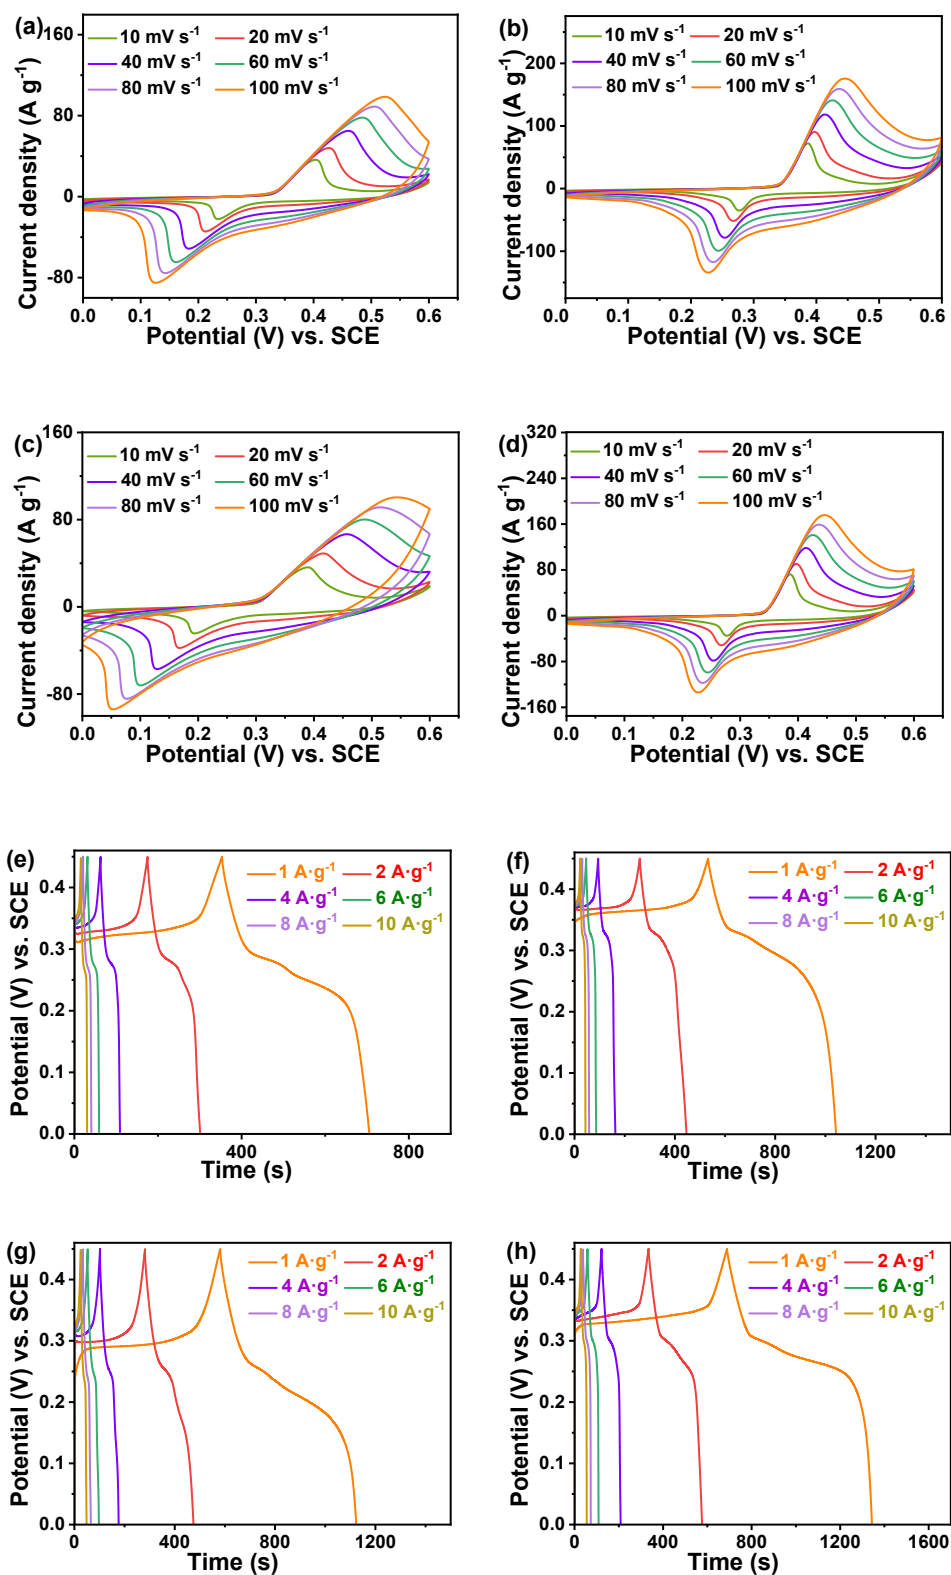

**Fig. S1.** CV curves at different scan rates and GCD curves at different of (a,e)  $\text{CeO}_2$ , (b, f)  $\text{Co}_3\text{O}_4$ , (c,g)  $2\text{CeO}_2@\text{Co}_3\text{O}_4$ , (d, h)  $\text{CeO}_2@2\text{Co}_3\text{O}_4$

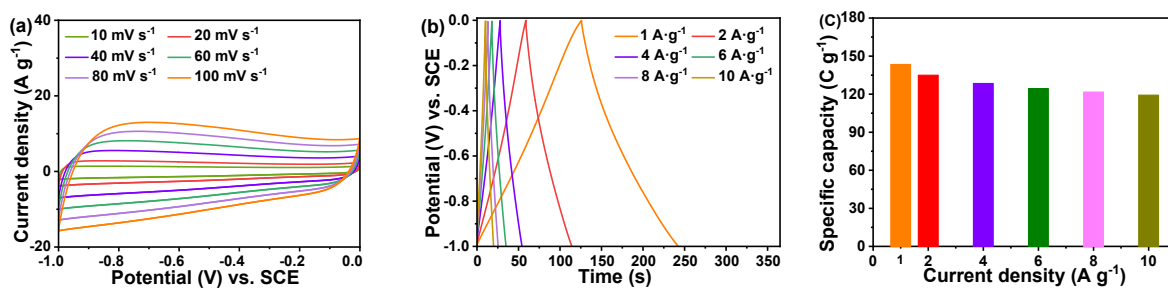

**Fig. S2.** (a) CV curves at different scan rates, (b) GCD curves, and (c) corresponding specific capacitance at various current densities of AC.

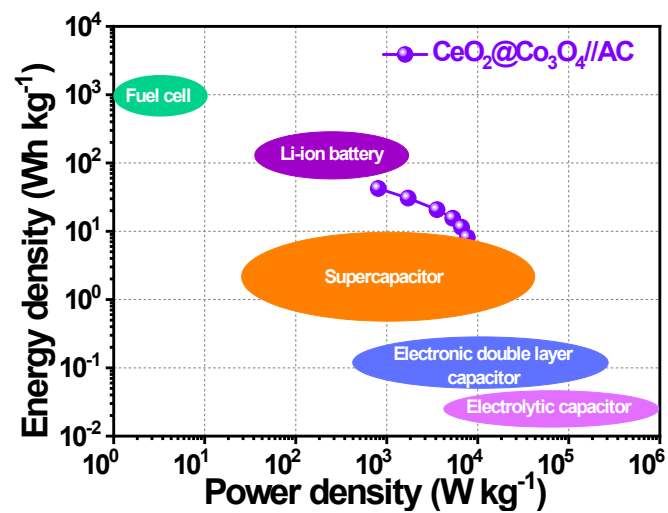

**Fig. S3.** Ragone plot illustrating the performances of specific power vs specific energy for the device and different electrical energy-storage technologies

**Table S1.** The comparison of the nanostructure, preparation method, and electrochemical property of CeO<sub>2</sub>-based composites.

| Nano-structure                                                                               | Preparation method     | Specific capacitance                             | Electrolyte                         | Cycle stability (cycles, current density) | Ref. |
|----------------------------------------------------------------------------------------------|------------------------|--------------------------------------------------|-------------------------------------|-------------------------------------------|------|
| CeO <sub>2</sub> @ZnO monodispersed spherical-shaped                                         | Chemical precipitation | 377 F g <sup>-1</sup> (1 A g <sup>-1</sup> )     | 1 M LiClO <sub>4</sub>              | 94.6% (1000, 1 A g <sup>-1</sup> )        | 1    |
| CdS/rGO/CeO <sub>2</sub> spherical nanoparticles                                             | Hydrothermal           | 407 F g <sup>-1</sup> (1 A g <sup>-1</sup> )     | 2 M KOH                             | 96% (5000, 1 A g <sup>-1</sup> )          | 2    |
| CeO <sub>2</sub> /rGO spherical nanoparticles                                                | Hydrothermal           | 89 F g <sup>-1</sup> (10 mV s <sup>-1</sup> )    | 3 M KOH                             | 96% (1000)                                | 3    |
| MnO <sub>2</sub> /CeO <sub>2</sub> nanorods                                                  | Hydrothermal           | 274 F g <sup>-1</sup> (500 mA g <sup>-1</sup> )  | 3 M KOH                             | 93.9% (1000, 500 mA g <sup>-1</sup> )     | 4    |
| rGO/CeO <sub>2</sub> nanoparticles                                                           | Self-assembly          | 265 F g <sup>-1</sup> (5 mV s <sup>-1</sup> )    | 3 M KOH                             | 96.2% (1000, 80 mV s <sup>-1</sup> )      | 5    |
| rGO-CeO <sub>2</sub> /porous nanoparticles                                                   | In situ polymerization | 454.8 F g <sup>-1</sup> (1 A g <sup>-1</sup> )   | 1 M H <sub>2</sub> SO <sub>4</sub>  | 70.23% (10,000, 5 A g <sup>-1</sup> )     | 6    |
| NiO@CeO <sub>2</sub> Spherical flowerlike                                                    | Hydrothermal           | 543.6 F g <sup>-1</sup> (1 A g <sup>-1</sup> )   | 2 M KOH                             | 74.39 % (10,000, 20 A g <sup>-1</sup> )   | 7    |
| CeO <sub>2</sub> /C integrated MoS <sub>2</sub> spherical particles                          | Hydrothermal           | 1325.67 F g <sup>-1</sup> (1 A g <sup>-1</sup> ) | 2 M KOH                             | 92.8% (1000, 1 A g <sup>-1</sup> )        | 8    |
| CeO <sub>2</sub> @CoP/NF nanoflowers                                                         | Hydrothermal           | 595.1 C g <sup>-1</sup> (1 A g <sup>-1</sup> )   | 6 M KOH                             | 89% (5000, 5 A g <sup>-1</sup> )          | 9    |
| Mn <sub>3</sub> O <sub>4</sub> -CeO <sub>2</sub> / holey-graphene hierarchical architectures | Hydrothermal           | 310 F g <sup>-1</sup> (2 A g <sup>-1</sup> )     | 1 M Na <sub>2</sub> SO <sub>4</sub> | 92.4% (1000, 2 A g <sup>-1</sup> )        | 10   |
| CeO <sub>2</sub> /Co <sub>3</sub> O <sub>4</sub> /rGO flammulina-velutipes-like              | Hydrothermal           | 1606.6 F g <sup>-1</sup> (1 A g <sup>-1</sup> )  | 6 M KOH                             | 92.4% (10,000, 10 A g <sup>-1</sup> )     | 11   |
| α-Fe <sub>2</sub> O <sub>3</sub> @CeO <sub>2</sub> core-shell                                | Calcination            | 168 F g <sup>-1</sup> (5 mV s <sup>-1</sup> )    | 2 M Na <sub>2</sub> SO <sub>4</sub> | 87.5% (2000, 200 mV s <sup>-1</sup> )     | 12   |
| CeO <sub>2</sub> @Co <sub>3</sub> O <sub>4</sub> thin sheets                                 | Hydrothermal           | 1856 F g <sup>-1</sup> (1 A g <sup>-1</sup> )    | 2M KOH                              | 83.79% (10,000, 10 A g <sup>-1</sup> )    | This |



**Table S2.** The fitted result of EIS data

| <b>Electrode</b>                                  | <b><math>R_{ct}</math> (<math>\Omega</math>)</b> | <b><math>R_s</math> (<math>\Omega</math>)</b> |
|---------------------------------------------------|--------------------------------------------------|-----------------------------------------------|
| CeO <sub>2</sub>                                  | 7.112                                            | 1.151                                         |
| CeO <sub>2</sub> @Co <sub>3</sub> O <sub>4</sub>  | 0.380                                            | 0.626                                         |
| 2CeO <sub>2</sub> @Co <sub>3</sub> O <sub>4</sub> | 3.491                                            | 0.627                                         |
| CeO <sub>2</sub> @2Co <sub>3</sub> O <sub>4</sub> | 2.011                                            | 0.622                                         |
| Co <sub>3</sub> O <sub>4</sub>                    | 4.309                                            | 0.630                                         |

## References

1. G. Manibalan, M. Rajesh Kumar, G. Murugadoss, J. Yesuraj, R. Mohan Kumar and R. Jayavel, *Journal of Materials Science: Materials in Electronics*, 2021, **32**, 8746-8755.
2. A. A. Ali, A. A. Nazeer, M. Madkour, A. Bumajdad and F. Al Sagheer, *Arabian Journal of Chemistry*, 2018, **11**, 692-699.
3. S. Sagadevan, M. R. Johan and J. A. Lett, *Appl. Phys. A*, 2019, **125**, 315.
4. H. Zhang, J. Gu, J. Tong, Y. Hu, B. Guan, B. Hu, J. Zhao and C. Wang, *Chem. Eng. J.*, 2016, **286**, 139-149.
5. Z. Ji, X. Shen, H. Zhou and K. Chen, *Ceram. Int.*, 2015, **41**, 8710-8716.
6. A. Xie, F. Tao, T. Li, L. Wang, S. Chen, S. Luo and C. Yao, *Electrochim. Acta*, 2018, **261**, 314-322.
7. T.-F. Yi, J. Mei, Y. Xie and S. Luo, *Electrochim. Acta*, 2019, **297**, 593-605.
8. R. Govindan, X.-J. Hong, P. Sathishkumar, Y.-P. Cai and F. L. Gu, *Electrochim. Acta*, 2020, **353**, 136502.
9. H. Xing, G. Long, J. Zheng, H. Zhao, Y. Zong, X. Li, Y. Wang, X. Zhu, M. Zhang and X. Zheng, *Electrochim. Acta*, 2020, **337**, 135817.
10. J. Qian, Y. Wang, Z. Chen, C. Liu, Y. Zhou, Y. Yang, Y. Song and B. Kong, *Inorg. Chem. Commun.*, 2019, **104**, 8-13.
11. Z. Wang, K. Zhao, S. Lu and W. Xu, *Electrochim. Acta*, 2020, **353**, 136599.
12. M. Mazloum-Ardakani, F. Sabaghian, M. Yavari, A. Ebady and N. Sahraie, *J. Alloys Compd.*, 2020, **819**, 152949.
